# Supplementary material for: Global Estimates of Syphilis in Pregnancy and Associated Adverse Outcomes: Analysis of Multinational Antenatal Surveillance Data
Source: PLoS Med. 2013 Feb 26;10(2):e1001396. doi: 10.1371/journal.pmed.1001396 (PMC3582608; doi:10.1371/journal.pmed.1001396)
Supplement: Dataset S1 — Country-level data and assumptions used for 2008 estimates of syphilis in pregnancy and associated adverse outcomes. (XLSX) [file pmed.1001396.s001.xlsx]

## Sheet: Sorted by Region
WHO region	ISO country code	Country Name	Data A: 2008 UA ANC syph prev	Data B: 2009 UA ANC syph prev	Combo 2008 UA prev + median: 2008 UA prev, OR 2009, OR regional median	Number of live births per 2008 UNPD WPP (from HIV Dept file)	Number of stillbirths 2008 per Cousens	Estimate of LB plus SB for 2008	"Estimated number of pregnancies" = LB + SB + early pregnancy losses (SB*0.2) for 2008	Country specific estimated number of pregnant women with probable "active" syphilis (2008)	Percent of women with at least 1 ANC visit (WHO, GHO, as of May 2011)	Percent of women with at least 1 ANC visit (WHO, GHO, as of May 2011) plus regional median if missing	Country-specific estimated number of pregnant women with probable active syphilis attending ANC - 2008	Country-specific estimated number of pregnant women with probable active syphilis not attending ANC - 2008					Regional estimated number of adverse pregnancy outcomes related to syphilis, with >=1 ANC visit		Regional estimated number of adverse pregnancy outcomes related to syphilis, no ANC visit	Regional estimated number of adverse pregnancy outcomes related to syphilis				Number AOs in women attending ANC - with NO services delivered	Number AOs in women not attending ANC	Number of AOs if no services provided	Number of AOs averted by current services (middle case)	Number of AOs averted if 81% coverage for testing AND treatment
AFR	SC	Seychelles	0.000583771		0.000583771	1367.25	20	1387.25	1391.25	0.527912		86	0.454005	0.0739077					UNTESTED OR UNTREATED	TESTED AND TREATED
AFR	MU	Mauritius		0.00153068	0.00153068	18092	180	18272	18308	18.2154		86	15.6652	2.55016		Any AO	AFRO	WORST	194826	3421.95	61832	260080		ANY AO	AFRO	216474	61832	278306	54676.3	147626
AFR	BJ	Benin		0.00275441	0.00275441	341754	8560	350314	352026	630.256	84	84	529.415	100.841				MIDDLE	151532	10265.9		223630			EMRO	13451.8	7380.57	20832.3	3397.61	9173.55
AFR	SL	Sierra Leone		0.00361011	0.0036	223173	6940	230113	231501	541.712	87	87	471.29	70.4226				BEST	108237	17109.8		187179			EURO	10939.9	293.043	11233	6447.4	8289.52
AFR	CI	Côte d'Ivoire	0.00441205	0.00177567	0.00441205	721870	23850	745720	750490	2152.28	85	85	1829.44	322.842				ECS	41130	27717.8		130680			PAHO	52099.9	3280.01	55379.9	26318.5	35529.9
AFR	CM	Cameroon		0.00557901	0.00557901	704287	18540	722827	726535	2634.68	82	82	2160.43	474.242			EMRO	WORST	12106.6	212.642	7380.57	19699.8			SEARO	246310	67402.9	313712	82949.5	167973
AFR	CV	Cape Verde	0.00576314		0.00576314	12036	230	12266	12312	46.1212	98	98	45.1988	0.922424				MIDDLE	9416.25	637.925		17434.7			WPRO	25256.2	2732.65	27988.8	12758.3	17223.7
AFR	DZ	Algeria	0.00836684		0.00836684	714460	8210	722670	724312	3939.13	89	89	3505.83	433.304				BEST	6725.89	1063.21		15169.7
AFR	ST	Sao Tome and Principe	0.0085439	0.00356062	0.0085439	5146	120	5266	5290	29.3782	98	98	28.7906	0.587564				ECS	2555.84	1722.4		11658.8			GLOBAL	564531	142921	707452	186548	385815
AFR	ER	Eritrea	0.0110249		0.0110249	182044	3980	186024	186820	1338.79	70	70	937.151	401.636			EURO	WORST	5469.96	864.675	293.043	6627.68
AFR	MW	Malawi		0.0111753	0.0111753	598650	14800	613450	616410	4477.56	92	92	4119.36	358.205				MIDDLE	3281.98	1210.54		4785.56
AFR	TG	Togo	0.0126253	0.0109659	0.0126253	212751	5510	218261	219363	1800.19	84	84	1512.16	288.031				BEST	1093.99	1556.41		2943.45
AFR	LS	Lesotho	0.0141066		0.0141066	59347	1570	60917	61231	561.444	90	90	505.3	56.1444				ECS	1093.99	1556.41		2943.45
AFR	BI	Burundi	0.014553	0.0137249	0.014553	277516	7890	285406	286984	2714.71	92	92	2497.54	217.177			PAHO	WORST	31260	3294.32	3280.01	37834.3
AFR	GN	Guinea	0.0146424	0.0151536	0.0146424	392171	9580	401751	403667	3841.93	88	88	3380.9	461.032				MIDDLE	20840	4941.48		29061.5
AFR	NG	Nigeria	0.0150054	0.0150054	0.0150054	6027913	263800	6291713	6344473	61881	58	58	35891	25990				BEST	10420	6588.64		20288.6		EFL/SB	AFRO	87422.1	24970.6	112393	21505.8	58065.8
AFR	RW	Rwanda	0.0157071	0.0156818	0.0157071	403007	9350	412357	414227	4229.09	96	96	4059.92	169.164				ECS	9898.98	6670.99		19850			EMRO	5432.45	2980.61	8413.06	1336.38	3608.23
AFR	KE	Kenya	0.0188206		0.0188206	1506302	33660	1539962	1546694	18921.3	92	92	17407.6	1513.7			SEARO	WORST	197048	7787.17	67402.9	272238			EURO	4418.05	118.344	4536.39	2535.96	3260.52
AFR	CD	Democratic Republic of the Congo	0.0198218	0.0198179	0.0198218	2886065	96390	2982455	3001733	38674.8	85	85	32873.5	5801.21				MIDDLE	147786	15574.3		230763			PAHO	21040.4	1324.62	22365	10351.9	13975
AFR	KM	Comoros	0.0227083		0.0227083	21448	600	22048	22168	327.209	75	75	245.407	81.8022				BEST	98523.8	23361.5		189288			SEARO	99471.2	27220.4	126692	32626.5	66068.7
AFR	BF	Burkina Faso	0.0237401	0.0213357	0.0237401	720788	19440	740228	744116	11482.5	85	85	9760.13	1722.38				ECS	46798.8	31538		145740			WPRO	10199.6	1103.57	11303.2	5018.21	6774.58
AFR	GA	Gabon	0.0240137	0.00940144	0.0240137	39545	700	40245	40385	630.366	94	94	592.544	37.822			WPRO	WORST	15153.7	1596.97	2732.65	19483.3
AFR	BW	Botswana	0.0246368	0.01306	0.0246368	47217	750	47967	48117	770.541	97	97	747.424	23.1162				MIDDLE	10102.5	2395.45		15230.6			GLOBAL	227984	57718.2	285702	73374.8	151753
AFR	NE	Niger		0.0256	0.0256	790598	18640	809238	812966	13527.8	46	46	6222.77	7304.99				BEST	5051.24	3193.94		10977.8
AFR	ET	Ethiopia	0.026734		0.026734	309390	81940	391330	407718	7084.96	28	28	1983.79	5101.17				ECS	4798.68	3233.86		10765.2
AFR	NA	Namibia	0.0340221	0.0231701	0.0340221	58741	900	59641	59821	1322.91	95	95	1256.76	66.1453
AFR	ZW	Zimbabwe	0.0340424	0.00588235	0.0340424	377696	7740	385436	386984	8563.02	94	94	8049.24	513.781			GLOBAL	WORST	455864	17177.7	142921	615963
AFR	ZA	South Africa		0.0391045	0.0391045	1091347	22910	1114257	1118839	28438.6	92	92	26163.5	2275.09				MIDDLE	342958	35025.6		520905
AFR	ML	Mali	0.0401443	0.0399698	0.0401443	542350	12910	555260	557842	14556.2	70	70	10189.4	4366.87				BEST	230052	52873.5		425847		NEONATAL DEATHS	AFRO	37466.6	10701.7	48168.3	8991.99	24278.4
AFR	SZ	Swaziland	0.045187	0.0474667	0.045187	35040	650	35690	35820	1052.09	85	85	894.276	157.813				ECS	106276	72439.5		321637			EMRO	2328.19	1277.41	3605.6	558.766	1508.67
AFR	GW	Guinea-Bissau	0.0484076		0.0484076	64983	1980	66963	67359	2119.45	78	78	1653.17	466.279											EURO	1893.45	50.719	1944.17	1060.33	1363.28
AFR	ZM	Zambia	0.0520392	0.0510438	0.0520392	542468	14440	556908	559796	18935.4	94	94	17799.2	1136.12		Early fetal loss	AFRO	Worst	78679.9	1573.6	24970.6	105224			PAHO	9017.29	567.694	9584.99	4328.3	5843.21
AFR	GH	Ghana	0.0597299	0.0614861	0.0597299	756515	17150	773665	777095	30170.3	90	90	27153.3	3017.03			AFRO	Middle	61195.5	4720.79		90886.9			SEARO	42630.5	11665.9	54296.4	13641.8	27624.6
AFR	TZ	United Republic of Tanzania	0.0689115	0.044	0.0689115	1771373	47060	1818433	1827845	81873.7	76	76	62224	19649.7			AFRO	Best	43711.1	7867.99		76549.7			WPRO	4371.26	472.958	4844.22	2098.21	2832.58
AFR	TD	Chad		0.0729991	0.0729991	498429	14990	513419	516417	24503.7	39	39	9556.44	14947.3			AFRO	ECS	16610.2	12746.1		54327
AFR	CF	Central African Republic	0.0757248	0.0587977	0.0757248	153953	4500	158453	159353	7843.53	69	69	5412.04	2431.49			EMRO	Worst	4889.2	97.7841	2980.61	7967.6			GLOBAL	97707.3	24736.4	122444	30679.4	63450.7
AFR	MZ	Mozambique	0.0787852	0.0692801	0.0787852	876499	25800	902299	907459	46471.3	89	89	41359.5	5111.85			EMRO	Middle	3802.71	293.352		7076.68
AFR	MG	Madagascar	0.0912291	0.0770233	0.0912291	687234	14600	701834	704754	41791.1	80	80	33432.9	8358.23			EMRO	Best	2716.22	488.92		6185.76
AFR	AO	Angola			0.021265	773674	19990	793664	797662	11025.5	80	80	8820.41	2205.1			EMRO	ECS	1032.17	792.051		4804.83
AFR	CG	Congo			0.021265	125044	3270	128314	128968	1782.63	86	86	1533.06	249.568			EURO	Worst	2209.02	397.624	118.344	2724.99
AFR	GM	Gambia			0.021265	61096	1630	62726	63052	871.522	98	98	854.092	17.4304			EURO	Middle	1325.41	556.674		2000.43
AFR	GQ	Equatorial Guinea			0.021265	25064	430	25494	25580	353.574	86	86	304.074	49.5003			EURO	Best	441.805	715.723		1275.87		Prematurity PTD	AFRO	24977.7	7134.46	32112.2	4795.73	12948.5
AFR	LR	Liberia			0.021265	145435	4100	149535	150355	2078.25	79	79	1641.82	436.432			EURO	ECS	441.805	715.723		1275.87			EMRO	1552.13	851.604	2403.73	298.009	804.623
AFR	MR	Mauritania			0.021265	107962	2950	110912	111502	1541.21	75	75	1155.91	385.303			PAHO	Worst	12624.2	1514.91	1324.62	15463.7			EURO	1262.3	33.8127	1296.11	565.51	727.084
AFR	SN	Senegal			0.021265	470224	16550	486774	490084	6774.08	87	87	5893.45	880.63			PAHO	Middle	8416.14	2272.36		12013.1			PAHO	6011.53	378.462	6389.99	2308.43	3116.38
AFR	UG	Uganda			0.021265	1465633	37420	1503053	1510537	20879.1	94	94	19626.3	1252.74			PAHO	Best	4208.07	3029.81		8562.5			SEARO	28420.3	7777.26	36197.6	7275.61	14733.1
										535203			416296	118908			PAHO	ECS	3997.67	3067.68		8389.97			WPRO	2914.18	315.305	3229.48	1119.04	1510.71
AMR	SV	El Salvador	0.00144043	0.00289603	0.00144043	124336	1820	126156	126520	118.458	94	94	111.35	7.10747			SEARO	Worst	79576.9	3580.96	27220.4	110378
AMR	CL	Chile	0.00183497	0.00151463	0.00183497	251219	2260	253479	253931	302.871	95	95	287.728	15.1436			SEARO	Middle	59682.7	7161.92		94065			GLOBAL	65138.2	16490.9	81629.1	16362.3	33840.4
AMR	MX	Mexico		0.00271012	0.00271012	2048640	11390	2060030	2062308	3632.91	94	94	3414.94	217.975			SEARO	Best	39788.5	10742.9		77751.8
AMR	DM	Dominica		0.00422386	0.00422386	1140	10	1150	1152	3.16283	100	100	3.16283	0			SEARO	ECS	18899.5	14502.9		60622.8
AMR	PE	Peru	0.00542404	0.00334388	0.00542404	608951	6390	615341	616619	2173.97	91	91	1978.31	195.657			WPRO	Worst	6119.77	734.372	1103.57	7957.71
AMR	DO	Dominican Republic	0.00545134	0.0036	0.00545134	224178	2700	226878	227418	805.826	99	99	797.768	8.05826			WPRO	Middle	4079.85	1101.56		6284.97
AMR	NI	Nicaragua	0.00556951	0.00449722	0.00556951	139970	2060	142030	142442	515.666	90	90	464.099	51.5666			WPRO	Best	2039.92	1468.74		4612.24
AMR	GY	Guyana	0.00663435	0.00172575	0.00663435	13622	230	13852	13898	59.9327	81	81	48.5455	11.3872			WPRO	ECS	1937.93	1487.1		4528.6
AMR	AG	Antigua and Barbuda		0.00716846	0.00716846	1432.74	10	1442.74	1444.74	6.73174	100	100	6.73174	0										CLINICAL DISEASE	AFRO	66607.3	19025.2	85632.6	19382.7	52333.4
AMR	CU	Cuba		0.0077243	0.0077243	117508	910	118418	118600	595.466	100	100	595.466	0			GLOBAL	WORST	184099	7899.25	57718.2	249716			EMRO	4139.01	2270.94	6409.95	1204.45	3252.02
AMR	GT	Guatemala	0.00842948	0.00545726	0.00842948	452662	4530	457192	458098	2509.99	84	84	2108.39	401.599				MIDDLE	138502	16106.7		212327			EURO	3366.13	90.1671	3456.3	2285.6	2938.63
AMR	BZ	Belize	0.00888958		0.00888958	7435	90	7525	7543	43.5852	94	94	40.9701	2.61511				BEST	92905.5	24314.1		174938			PAHO	16030.7	1009.23	17040	9329.89	12595.4
AMR	CO	Colombia		0.0113953	0.0113953	918469	8110	926579	928201	6875.12	94	94	6462.62	412.507				ECS	42919.3	33311.6		133949			SEARO	75787.6	20739.4	96526.9	29405.6	59546.3
AMR	HN	Honduras	0.0124821	0.000712847	0.0124821	201543	3600	205143	205863	1670.25	92	92	1536.63	133.62											WPRO	7771.13	840.814	8611.95	4522.8	6105.78
AMR	AR	Argentina	0.0140014	0.0140014	0.0140014	689252	3400	692652	693332	6309.94	99	99	6246.84	63.0994		Neonatal death	AFRO	WORST	33720	749.332	10701.7	45171
AMR	TT	Trinidad and Tobago	0.0143118	0.016672	0.0143118	19783	170	19953	19987	185.932	96	96	178.495	7.43729			AFRO	MIDDLE	26226.6	2248		39176.3			GLOBAL	173702	43975.8	217678	66131	136771
AMR	BR	Brazil	0.0159762	0.0159762	0.0159762	3104862	29950	3134812	3140802	32615.8	98	98	31963.5	652.316			AFRO	BEST	18733.3	3746.66		33181.7
AMR	JM	Jamaica	0.0161418		0.0161418	52400	660	53060	53192	558.099	91	91	507.87	50.2289			AFRO	ECS	7118.66	6069.59		23889.9
AMR	PY	Paraguay	0.0464817	0.0343153	0.0464817	153686	3060	156746	157358	4754.27	96	96	4564.1	190.171			EMRO	WORST	2095.37	46.5639	1277.41	3419.34
AMR	HT	Haiti	0.0497017		0.0497017	273184	4320	277504	278368	8992.98	85	85	7644.04	1348.95			EMRO	MIDDLE	1629.73	139.692		3046.83
AMR	GD	Grenada		0.0525384	0.0525384	2012	20	2032	2036	69.5293	100	100	69.5293	0			EMRO	BEST	1164.1	232.819		2674.32
AMR	BB	Barbados			0.00842948	2859	30	2889	2895	15.8622	100	100	15.8622	0			EMRO	ECS	442.357	377.167		2096.93
AMR	BO	Bolivia (Plurinational State of)			0.00842948	262786	4230	267016	267862	1467.66	77	77	1130.1	337.562			EURO	WORST	946.724	189.345	50.719	1186.79
AMR	BS	Bahamas			0.00842948	5646	50	5696	5706	31.2641	98	98	30.6388	0.625282			EURO	MIDDLE	568.034	265.083		883.836
AMR	CA	Canada			0.00842948	353105	1160	354265	354497	1942.35		93.9313	1824.47	117.875			EURO	BEST	189.345	340.821		580.885
AMR	CR	Costa Rica			0.00842948	75436	390	75826	75904	415.89	90	90	374.301	41.589			EURO	ECS	189.345	340.821		580.885
AMR	EC	Ecuador			0.00842948	280839	3530	284369	285075	1561.97	84	84	1312.06	249.915			PAHO	WORST	5410.38	721.383	567.694	6699.45
AMR	KN	Saint Kitts and Nevis			0.00842948	707.918	10	717.918	719.918	3.94455	100	100	3.94455	0			PAHO	MIDDLE	3606.92	1082.08		5256.69
AMR	LC	Saint Lucia			0.00842948	3035	50	3085	3095	16.958	99	99	16.7884	0.16958			PAHO	BEST	1803.46	1442.77		3813.92
AMR	PA	Panama			0.00842948	70143	730	70873	71019	389.124	72	72	280.17	108.955			PAHO	ECS	1713.29	1460.8		3741.78
AMR	SR	Suriname			0.00842948	9774	150	9924	9954	54.5396	90	90	49.0856	5.45396			SEARO	WORST	34104.4	1705.22	11665.9	47475.5
AMR	US	United States of America			0.00842948	4398904	13060	4411964	4414576	24188.2		93.9313	22720.3	1467.9			SEARO	MIDDLE	25578.3	3410.44		40654.6
AMR	UY	Uruguay			0.00842948	50356	470	50826	50920	278.999	97	97	270.629	8.36997			SEARO	BEST	17052.2	5115.66		33833.8
AMR	VC	Saint Vincent and the Grenadines			0.00842948	1917	20	1937	1941	10.6351	95	95	10.1033	0.531753			SEARO	ECS	8099.79	6906.14		26671.8
AMR	VE	Venezuela (Bolivarian Republic of)			0.00842948	598525	6480	605005	606301	3322.02	94	94	3122.7	199.321			WPRO	WORST	2622.76	349.701	472.958	3445.42
										106500			100192	6307.71			WPRO	MIDDLE	1748.51	524.552		2746.01
EMR	IQ	Iraq	0		0	944060	8220	952280	953924	0	84	84	0	0			WPRO	BEST	874.253	699.402		2046.61
EMR	JO	Jordan	0	0	0	156913	2010	158923	159325	0	99	99	0	0			WPRO	ECS	830.54	708.145		2011.64
EMR	OM	Oman	0.000388301	0.00036932	0.00036932	61369	400	61769	61849	14.8473	100	100	14.8473	0
EMR	SA	Saudi Arabia	0.000567269	0.000567269	0.000567269	590623	4540	595163	596071	219.786	90	90	197.807	21.9786			GLOBAL	WORST	78899.6	3761.55	24736.4	107397
EMR	DJ	Djibouti	0.00794151	0.00452923	0.00794151	24182	850	25032	25202	130.092	92	92	119.685	10.4074				MIDDLE	59358.1	7669.84		91764.3
EMR	MA	Morocco	0.0109		0.0109	646451	12960	659411	662003	4690.3	68	68	3189.4	1500.89				BEST	39816.7	11578.1		76131.2
EMR	SD	Sudan		0.0349192	0.0349192	1295961	31740	1327701	1334049	30279.6	64	64	19378.9	10900.7				ECS	18394	15862.7		58993
EMR	AE	United Arab Emirates			0.000567269	62566	280	62846	62902	23.1935	97	97	22.4977	0.695805
EMR	AF	Afghanistan			0.000567269	1268597	38390	1306987	1314665	484.749	16	16	77.5599	407.189		Prematurity or LBW	AFRO	WORST	22480	899.199	7134.46	30513.6
EMR	BH	Bahrain			0.000567269	13976	120	14096	14120	5.20639	97	97	5.0502	0.156192			AFRO	MIDDLE	17484.4	2697.6		27316.5
EMR	EG	Egypt			0.000567269	2015085	27350	2042435	2047905	755.113	74	74	558.784	196.329			AFRO	BEST	12488.9	4495.99		24119.3
EMR	IR	Iran (Islamic Republic of)			0.000567269	1387666	17470	1405136	1408630	519.397	98	98	509.009	10.3879			AFRO	ECS	4745.77	7283.51		19163.7
EMR	KW	Kuwait			0.000567269	51629	250	51879	51929	19.1475	95	95	18.1901	0.957375			EMRO	WORST	1396.92	55.8766	851.604	2304.4
EMR	LB	Lebanon			0.000567269	65937	580	66517	66633	24.5692	96	96	23.5865	0.982769			EMRO	MIDDLE	1086.49	167.63		2105.72
EMR	LY	Libyan Arab Jamahiriya			0.000567269	146762	1310	148072	148334	54.6944	81	81	44.3025	10.3919			EMRO	BEST	776.064	279.383		1907.05
EMR	PK	Pakistan			0.000567269	5336931	257730	5594661	5646207	2081.9	61	61	1269.96	811.939			EMRO	ECS	294.904	452.601		1599.11
EMR	QA	Qatar			0.000567269	14979	130	15109	15135	5.58065		87	4.85516	0.725484			EURO	WORST	631.149	227.214	33.8127	892.176
EMR	SO	Somalia			0.000567269	395343	12250	407593	410043	151.193	26	26	39.3102	111.883			EURO	MIDDLE	378.69	318.099		730.602
EMR	SY	Syrian Arab Republic			0.000567269	590217	7380	597597	599073	220.893	84	84	185.55	35.3429			EURO	BEST	126.23	408.985		569.027
EMR	TN	Tunisia			0.000567269	163592	1840	165432	165800	61.1345	96	96	58.6892	2.44538			EURO	ECS	126.23	408.985		569.027
EMR	YE	Yemen			0.000567269	845843	20210	866053	870095	320.825	47	47	150.788	170.037			PAHO	WORST	3606.92	865.66	378.462	4851.04
										40062.2			25868.8	14193.4			PAHO	MIDDLE	2404.61	1298.49		4081.56
EUR	AZ	Azerbaijan	8.6039e-05		8.6039e-05	165710	2140	167850	168278	9.41101	77	77	7.24647	2.16453			PAHO	BEST	1202.31	1731.32		3312.09
EUR	KG	Kyrgyzstan	0.000242524	0.000791954	0.000242524	120261	1230	121491	121737	19.1907	97	97	18.615	0.575721			PAHO	ECS	1142.19	1752.96		3273.61
EUR	BY	Belarus	0.0006354	0.000565386	0.000565386	96305	350	96655	96725	35.5465	99	99	35.1911	0.355465			SEARO	WORST	22736.3	2046.26	7777.26	32559.8
EUR	NL	Netherlands	0.000746749		0.000746749	185074	610	185684	185806	90.1878		98	88.3841	1.80376			SEARO	MIDDLE	17052.2	4092.53		28922
EUR	CZ	Czech Republic		0.0009136	0.0009136	109092	250	109342	109392	64.9613	99	99	64.3117	0.649613			SEARO	BEST	11368.1	6138.79		25284.2
EUR	GE	Georgia	0.00118758		0.00118758	52174	900	53074	53254	41.1084	94	94	38.6418	2.4665			SEARO	ECS	5399.86	8287.37		21464.5
EUR	GB	United Kingdom of Great Britain and Northern Ireland	0.0015556	0.00171112	0.0015556	742993	2610	745603	746125	754.438		98	739.35	15.0888			WPRO	WORST	1748.51	419.641	315.305	2483.45
EUR	MD	Republic of Moldova	0.00273538	0.00259016	0.00273538	44931	350	45281	45351	80.6341	98	98	79.0214	1.61268			WPRO	MIDDLE	1165.67	629.462		2110.44
EUR	DE	Germany		0.00337168	0.00337168	665902	1630	667532	667858	1463.67		98	1434.4	29.2734			WPRO	BEST	582.835	839.283		1737.42
EUR	TJ	Tajikistan	0.00836551		0.00836551	192835	2380	195215	195691	1064.09	89	89	947.036	117.049			WPRO	ECS	553.693	849.774		1718.77
EUR	UZ	Uzbekistan	0.0107472	0.0002353	0.0107472	553292	3600	556892	557612	3895.29	99	99	3856.34	38.9529
EUR	RO	Romania	0.0161648	0.0161648	0.0161648	213605	940	214545	214733	2256.23	94	94	2120.86	135.374			GLOBAL	WORST	52599.7	4513.85	16490.9	73604.5
EUR	KZ	Kazakhstan	0.0222717		0.0222717	304266	1590	305856	306174	4432.36	100	100	4432.36	0				MIDDLE	39572.1	9203.81		65266.8
EUR	AD	Andorra			0.0015556	819.409	0	819.409	819.409	0.828539		98	0.811969	0.0165708				BEST	26544.4	13893.8		56929.1
EUR	AL	Albania			0.0015556	46075	250	46325	46375	46.8917	97	97	45.485	1.40675				ECS	12262.7	19035.2		47788.8
EUR	AM	Armenia			0.0015556	47106	720	47826	47970	48.5045	93	93	45.1092	3.39531
EUR	AT	Austria			0.0015556	75860	250	76110	76160	77.0086	100	100	77.0086	0		Clinical disease	AFRO	WORST	59946.6	199.822	19025.2	79171.6
EUR	BA	Bosnia and Herzegovina			0.0015556	34362	150	34512	34542	34.9269	99	99	34.5776	0.349269			AFRO	MIDDLE	46625.1	599.466		66249.8
EUR	BE	Belgium			0.0015556	118948	370	119318	119392	120.722		98	118.308	2.41445			AFRO	BEST	33303.7	999.11		53328
EUR	BG	Bulgaria			0.0015556	72691	530	73221	73327	74.144		98	72.6611	1.48288			AFRO	ECS	12655.4	1618.56		33299.2
EUR	CH	Switzerland			0.0015556	72566	190	72756	72794	73.6051		98	72.133	1.4721			EMRO	WORST	3725.11	12.417	2270.94	6008.47
EUR	CY	Cyprus			0.0015556	9921	20	9941	9945	10.0558		98	9.85469	0.201116			EMRO	MIDDLE	2897.31	37.2511		5205.5
EUR	DK	Denmark			0.0015556	62329	140	62469	62497	63.1933		98	61.9295	1.26387			EMRO	BEST	2069.5	62.0851		4402.53
EUR	EE	Estonia			0.0015556	15934	50	15984	15994	16.1722		98	15.8488	0.323444			EMRO	ECS	786.412	100.578		3157.93
EUR	ES	Spain			0.0015556	491277	1520	492797	493101	498.595		98	488.623	9.9719			EURO	WORST	1683.07	50.492	90.1671	1823.72
EUR	FI	Finland			0.0015556	59010	120	59130	59154	59.8131	100	100	59.8131	0			EURO	MIDDLE	1009.84	70.6887		1170.69
EUR	FR	France			0.0015556	751738	2970	754708	755302	763.718	99	99	756.08	7.63718			EURO	BEST	336.613	90.8855		517.666
EUR	GR	Greece			0.0015556	106690	310	107000	107062	108.255		98	106.09	2.1651			EURO	ECS	336.613	90.8855		517.666
EUR	HR	Croatia			0.0015556	42170	140	42310	42338	42.8097		98	41.9535	0.856195			PAHO	WORST	9618.45	192.369	1009.23	10820
EUR	HU	Hungary			0.0015556	98598	310	98908	98970	100.073		98	98.0713	2.00145			PAHO	MIDDLE	6412.3	288.553		7710.08
EUR	IE	Ireland			0.0015556	69101	230	69331	69377	70.15		98	68.747	1.403			PAHO	BEST	3206.15	384.738		4600.12
EUR	IL	Israel			0.0015556	139892	480	140372	140468	142.033		98	139.192	2.84066			PAHO	ECS	3045.84	389.547		4444.62
EUR	IS	Iceland			0.0015556	4623	10	4633	4635	4.68664		98	4.59291	0.0937329			SEARO	WORST	60630	454.725	20739.4	81824.1
EUR	IT	Italy			0.0015556	545900	1480	547380	547676	553.778		98	542.703	11.0756			SEARO	MIDDLE	45472.5	909.451		67121.3
EUR	LT	Lithuania			0.0015556	31416	130	31546	31572	31.9238		98	31.2853	0.638475			SEARO	BEST	30315	1364.18		52418.6
EUR	LU	Luxembourg			0.0015556	5452	20	5472	5476	5.53701		98	5.42627	0.11074			SEARO	ECS	14399.6	1841.64		36980.6
EUR	LV	Latvia			0.0015556	23129	100	23229	23249	23.508		98	23.0379	0.470161			WPRO	WORST	4662.68	93.2536	840.814	5596.75
EUR	MC	Monaco			0.0015556	211.941	0	211.941	211.941	0.214302		98	0.210016	0.00428604			WPRO	MIDDLE	3108.45	139.88		4089.15
EUR	ME	Montenegro			0.0015556	7583	20	7603	7607	7.69176	97	97	7.461	0.230753			WPRO	BEST	1554.23	186.507		2581.55
EUR	MK	The former Yugoslav Republic of Macedonia			0.0015556	22243	140	22383	22411	22.6607	94	94	21.3011	1.35964			WPRO	ECS	1476.52	188.839		2506.17
EUR	MT	Malta			0.0015556	3680	10	3690	3692	3.73314		98	3.65847	0.0746627
EUR	NO	Norway			0.0015556	58069	130	58199	58225	58.8737		98	57.6963	1.17747			GLOBAL	WORST	140266	1003.08	43975.8	185245
EUR	PL	Poland			0.0015556	372234	1230	373464	373710	377.874		98	370.316	7.55748				MIDDLE	105526	2045.29		151547
EUR	PT	Portugal			0.0015556	104633	270	104903	104957	106.126		98	104.004	2.12253				BEST	70785.2	3087.5		117848
EUR	RS	Serbia			0.0015556	114517	580	115097	115213	116.497	98	98	114.167	2.32993				ECS	32700.4	4230.04		80906.2
EUR	RU	Russian Federation			0.0015556	1545359	15070	1560429	1563443	1580.86		98	1549.25	31.6173
EUR	SE	Sweden			0.0015556	107293	290	107583	107641	108.84		98	106.664	2.17681
EUR	SI	Slovenia			0.0015556	19473	70	19543	19557	19.7749	98	98	19.3794	0.395498
EUR	SK	Slovakia			0.0015556	54951	200	55151	55191	55.8059		98	54.6898	1.11612
EUR	SM	San Marino			0.0015556	286.989	0	286.989	286.989	0.290187		98	0.284383	0.00580374
EUR	TM	Turkmenistan			0.0015556	110667	1420	112087	112371	113.623	99	99	112.487	1.13623
EUR	TR	Turkey			0.0015556	1348091	15970	1364061	1367255	1382.49	92	92	1271.89	110.599
EUR	UA	Ukraine			0.0015556	458737	3790	462527	463285	468.447	99	99	463.762	4.68447
										21601.9			21038.3	563.545
SEAR	MV	Maldives		0	0	5725	80	5805	5821	0	81	81	0	0
SEAR	LK	Sri Lanka	0.000348681	0.000216363	0.000348681	365481	6540	372021	373329	84.6122	99	99	83.7661	0.846122
SEAR	TH	Thailand	0.00150311	0.00134132	0.00150311	976823	4280	981103	981959	959.395	98	98	940.207	19.1879
SEAR	BD	Bangladesh	0.0062275	0.0062275	0.0062275	3429541	131480	3561021	3587317	14521	51	51	7405.71	7115.29
SEAR	MM	Myanmar	0.0204198	0.00743716	0.0204198	1019702	20840	1040542	1044710	13866.3	76	76	10538.4	3327.91
SEAR	IN	India	0.0226218	0.00351714	0.0226218	26912842	613190	27526032	27648670	406550	74	74	300847	105703
SEAR	ID	Indonesia	0.0582524	0.0117124	0.0582524	4219718	63830	4283548	4296314	162676	93	93	151289	11387.3
SEAR	BT	Bhutan			0.0062275	14746	360	15106	15178	61.4386	88	88	54.066	7.37264
SEAR	KP	Democratic People's Republic of Korea			0.0062275	327180	4250	331430	332280	1345.03		79	1062.57	282.456
SEAR	NP	Nepal			0.0062275	731733	17760	749493	753045	3048.23	44	44	1341.22	1707.01
SEAR	TL	Timor-Leste			0.0062275	43919	650	44569	44699	180.936	61	61	110.371	70.565
										603293			473672	129621
WPR	LA	Lao People's Democratic Republic	0	0.00763359	0	169802	3010	172812	173414	0	35	35	0	0
WPR	MY	Malaysia	0.000769542	0.000698331	0.000769542	550633	3230	553863	554509	277.367	79	79	219.12	58.247
WPR	KH	Cambodia	0.00166524	0.0013	0.00166524	361300	7020	368320	369724	400.192	69	69	276.132	124.059
WPR	VN	Viet Nam	0.00203125	0.00212072	0.00203125	1493745	21080	1514825	1519041	2005.61	91	91	1825.1	180.505
WPR	PH	Philippines		0.00235194	0.00235194	2235801	36370	2272171	2279445	3484.72	91	91	3171.09	313.625
WPR	CN	China	0.00327901	0.00539456	0.00327901	18133735	165240	18298975	18332023	39072.1	91	91	35555.6	3516.49
WPR	BN	Brunei Darussalam	0.00419101		0.00419101	7775	50	7825	7835	21.3438	100	100	21.3438	0
WPR	MN	Mongolia	0.0188762	0.019661	0.0188762	49638	610	50248	50370	618.016	99	99	611.836	6.18016
WPR	PG	Papua New Guinea	0.0235842	0.057774	0.0235842	206904	3170	210074	210708	3230.1	79	79	2551.78	678.32
WPR	FJ	Fiji	0.0514695	0.0514695	0.0514695	17677	230	17907	17953	600.621		91	546.565	54.0559
WPR	KI	Kiribati		0.0560828	0.0560828	2289.89	30	2319.89	2325.89	84.7876	88	88	74.6131	10.1745
WPR	AU	Australia			0.00327901	267278	780	268058	268214	571.66	100	100	571.66	0
WPR	CK	Cook Islands			0.00327901	170.976	0	170.976	170.976	0.364411		91	0.331614	0.032797
WPR	FM	Micronesia (Federated States of)			0.00327901	2788	40	2828	2836	6.04453		91	5.50053	0.544008
WPR	JP	Japan			0.00327901	1033890	2750	1036640	1037190	2210.62		91	2011.67	198.956
WPR	KR	Republic of Korea			0.00327901	451665	1600	453265	453585	966.753		91	879.745	87.0077
WPR	MH	Marshall Islands			0.00327901	1955.67	20	1975.67	1979.67	4.21938	81	81	3.4177	0.801683
WPR	NR	Nauru			0.00327901	258.965	0	258.965	258.965	0.551948	95	95	0.52435	0.0275974
WPR	NU	Niue			0.00327901	40	0	40	40	0.0852544		91	0.0775815	0.00767289
WPR	NZ	New Zealand			0.00327901	58261	200	58461	58501	124.687	95	95	118.452	6.23433
WPR	PW	Palau			0.00327901	225.067	10	235.067	237.067	0.505276		91	0.459801	0.0454748
WPR	SB	Solomon Islands			0.00327901	15560	250	15810	15860	33.8034	74	74	25.0145	8.78887
WPR	SG	Singapore			0.00327901	37185	80	37265	37281	79.4592		91	72.3079	7.15133
WPR	TO	Tonga			0.00327901	2861	30	2891	2897	6.17455		91	5.61884	0.555709
WPR	TV	Tuvalu			0.00327901	245.043	0	245.043	245.043	0.522274	97	97	0.506606	0.0156682
WPR	VU	Vanuatu			0.00327901	7066	80	7146	7162	15.2648	84	84	12.8224	2.44237
WPR	WS	Samoa			0.00327901	4212	40	4252	4260	9.07959		91	8.26243	0.817163
										53824.7			48569.6	5255.09
Global TOTAL (193 countries)						1.33307e+08	2646720	1.35954e+08	1.36483e+08	1.36049e+06		88.419	1.08564e+06	274848
											147		0.797978
AFRO					0.021265						86
AMRO					0.00842948						94
EMRO					0.000567269						87
EURO					0.0015556						98
SEARO					0.0062275						78.5
WPRO					0.00327901						91

## Sheet: assumptions
Estimated proportion of syphilis seropositive women with probable "active syphilis"
0.65
				Expected proportion of women that have syphilis related adverse outcome without treatment	Effectiveness of penicillin treatment in reducing a given adverse outcome
any adverse outcome				0.52	0.841923	This "any" effectiveness value (0.8419) is the weighted average using as weights the outcome proportions in column E.
early fetal loss				0.21	0.82		0.403846
neonatal death				0.09	0.8		0.173077
prematurity or LBW				0.06	0.64		0.115385
clinical disease				0.16	0.97		0.307692
							1
% of ANC attendees tested AND treated for syphilis by region and scenario
	WORST	MIDDLE	BEST	ECS recommendation
AFRO	0.1	0.3	0.5	0.81
EMRO	0.1	0.3	0.5	0.81
EURO	0.5	0.7	0.9	0.9	Note: would assume EURO maintains higher level of testing and treatment
PAHO	0.4	0.6	0.8	0.81
SEARO	0.2	0.4	0.6	0.81
WPRO	0.4	0.6	0.8	0.81
	Median:	0.5
